# Supplementary material for: Echocardiography Indices in Urbanized Shor Ethnic Group Representatives With Arterial Hypertension
Source: Preprints.org preprint supplement (doi:10.20944/preprints202306.1860.v1), 2023-06-27
Supplement: Supplementary file 2 [file supplementary]

**Table S1.** Factors Associated with severely abnormal LVH in hypertensive patients (Logistic Regression Analysis).

| **Parameters** | **OR (95% CI)** | **Р** |
| --- | --- | --- |
| Model 1 All patients  Univariate analysis | | |
| Male | 2.11 (0.71-6.31) | 0.176 |
| Age | 1.03(1.02-0.96) | 0.366 |
| Smoking | 0.628 (0.24-1.65) | 0.341 |
| Smoking Experience | 1.0 (0.96-1.05) | 0.688 |
| Physical activity | 3.32 (0.62-17.64) | 0.152 |
| BMI | 0.96 (0.89-1.06) | 0.418 |
| Waist circumference | 0.99 (0.97-1.02) | 0.941 |
| Thigh circumference | 0.99 (0.97-1.02) | 0.991 |
| Systolic blood pressure | 1.02 (0.99-1.05) | 0.117 |
| Diastolic blood pressure | 1.02 (0.97-1.07) | 0.411 |
| Heart rate | 1.0 (0.68-1.0) | 0.684 |
| Glucose | 1.83 (1.1-3.03) | 0.017 |
| Total cholesterol | 1.05 (0.68-1.63) | 0.800 |
| Triglyceride | 0.93 (0.55-1.58) | 0.806 |
| LDL cholesterol | 1.12 (0.74-1.69) | 0.591 |
| HDL cholesterol | 0.98 (0.49-1.96) | 0.961 |
| Urea | 1.0 (0.98-1.03) | 0.691 |
| Creatinine | 0.87 (0.67-1.13) | 0.296 |
| Multivariate analysis | | |
| Glucose | 1.79 (1.08-2.97) | 0.020 |
| Model 2 Patients of Shor nationality | | |
| Male | 1.52 (0.44-5.19) | 0.495 |
| Age | 1.01 (0.95-1.08) | 0.624 |
| Smoking | 0.47 (1.16-1.44) | 0.186 |
| Smoking Experience | 1.01 (0.96-1.07) | 0.463 |
| Physical activity | 8.93 (0.83-95.2) | 0.066 |
| BMI | 0.9 (0.8-1.01) | 0.098 |
| Waist circumference | 0.98 (0.95-1.01) | 0.386 |
| Thigh circumference | 0.99 (0.94-1.04) | 0.721 |
| Systolic blood pressure | 1.0 (0.97-1.03) | 0.958 |
| Diastolic blood pressure | 0.96 (0.89-1.03) | 0.281 |
| Heart rate | 0.97 (0.92-1.02) | 0.250 |
| Glucose | 3.31 (1.6-6.85) | 0.001 |
| Total cholesterol | 0.79 (0.48-1.29) | 0.347 |
| Triglyceride | 0.9 (0.48-1.67) | 0.749 |
| LDL cholesterol | 0.77 (0.45-1.29) | 0.32 |
| HDL cholesterol | 1.18 (0.62-2.26) | 0.598 |
| Urea | 1.0 (0.98-1.03) | 0.509 |
| Creatinine | 078 (0.57-1.06) | 0.110 |
| Multivariate analysis | | |
| Glucose | 3.24 (1.56-6.7) | 0.001 |
| Model 3 Patients with non-indigenous ethnicity | | |
| Male | 3.6 (0.41-31.2) | 0.239 |
| Age | 1.03 (0.94-1.14) | 0.595 |
| Smoking | 1.28 (0.24-6.87) | 0.766 |
| Experience of Smoking | 0.98 (0.91-1.06) | 0.718 |
| Physical activity | 0.76 (0.1-5.5) | 0.784 |
| BMI | 1.06 (0.93-1.22) | 0.332 |
| Waist circumference | 1.02 (0.98-1.06) | 0.281 |
| Thigh circumference | 1.01 (0.95-1.07) | 0.632 |
| Systolic blood pressure | 1.04 (1.0-1.08) | 0.021 |
| Diastolic blood pressure | 1.09 (1.01-1.17) | 0.011 |
| Heart rate | 1.06 (1.0-1.12) | 0.033 |
| Glucose | 1.06 (0.69-1.62) | 0.782 |
| Total cholesterol | 1.9 (0.89-4.11) | 0.095 |
| Triglyceride | 1.01 (0.45-2.29) | 0.963 |
| LDL cholesterol | 1.99 (1.04-3.79) | 0.034 |
| HDL cholesterol | 0.26 (0.1-3.7) | 0.324 |
| Urea | 0.99 (0.96-1.03) | 0.792 |
| Creatinine | 1.12 (0.73-1.71) | 0.59 |
